# Supplementary material
Source: PubMed Central journal article supplement (PMC535381)

|             | 210         | 220                                   | 230                                         | 240 |                         | 270                     |                           | 320                         |
|-------------|-------------|---------------------------------------|---------------------------------------------|-----|-------------------------|-------------------------|---------------------------|-----------------------------|
| Hs PGRP-1αC | I I I H T   | A G T S . C T V S T D C Q T           | V V R N I Q S F R M D . . T R N F C D I G Y | H F | 244                     | Q G S H T Y G . F N D I | 271                       | L M G H S D V V I T L S P G |
| Hs PGRP-1αN | I I D Q L   | P G M Q . C Q Q S V C S Q M           | L R G L Q S F H S V Y . T I G W C D V A Y   | N F | 87                      | Q G L H T O G . Y N N I | 114                       | Q P L L L K E E T C L D P Q |
| Hs PGRP-1βC | I I I H T   | A G F T . C N I S D E C R L L         | V R D I Q S F H I D . . R L K S C D I G Y   | N F | 276                     | Q G S S T P G . Y D D I | 303                       | L V G H S D V A R T L S P G |
| Hs PGRP-1βN | V I H H V   | P G I E . C H D Q T V C S Q R         | V R L E L Q A H H V H . . N N S G C D V A Y | N F | 119                     | Q G V H T O G . Y N N I | 146                       | Q P L L V K G E N C I A P R |
| Mm PGRP-1αC | I I I H T   | A G S . C N E S A D C L V R R E       | L Q S F H I D . . N O D F C D I A Y         | H F | 250                     | E G S H T Y G . Y N D I | 277                       | L M G H S D V S T L S P G   |
| Mm PGRP-1αN | I I E Q V   | T R M Q . C Q D Q I T C S Q V         | V R V L Q S Q Y V H . . N K G W C D I A F   | N F | 94                      | Q G L H T O G . Y N N V | 121                       | Q P F L L S D E C I L V P Q |
| Mm PGRP-1βC | I I L H T   | A G F T . C S Q P D E C R L L         | V R D L Q S F H M N . . R L N A C D I G Y   | N F | 277                     | Q G S K T D S . Y N D I | 304                       | L M G H S D V S T L S P G   |
| Mm PGRP-1βN | V I H H I   | P G I E . C S N K T V C S Q K         | L R E L Q A Y H I H . . N . S W C D V A Y   | N F | 120                     | Q G S H D O G . Y N D I | 147                       | Q P L L A K S E D C I V P P |
| Dm PGRP-LFC | R F V A T   | N T F S . C F T Q A E C T F R         | V R L L Q N W H I E . . S N G Y K D I N Y   | N F | 301                     | . . . H S C E P P K D A | 325                       | L I D D L E K S . . . . .   |
| Dm PGRP-LFN | I I H H T   | A T E G . C E Q E D V C I R M K       | T I Q A F H M K . . S F G W V D I G Y       | N F | 124                     | Q Q H S G C H . Y G A I | 151                       | Y I A H R Q L S P T R S P G |
| Hs PGRP-S   | V V S H T   | A G S . C N T P A S C Q Q A R         | N V Q H Y H M K . . T L G W C D V G Y       | N F | 97                      | T G A H S S H L W N P M | 125                       | L K G H R D V Q R T L S P G |
| Mm PGRP-S   | V I S H T   | A G S F . C N S P D S C E Q A R       | N V Q H Y H M K . . E L G W C D V A Y       | N F | 84                      | K G D H T E P I W N P M | 112                       | V K G H R D V Q S T L S P G |
| Rn PGRP-S   | V I S H T   | A G S F . C N S P D S C E Q A R       | N V Q L Y H M K . . Q L G W C D V A Y       | N F | 85                      | K G D H T E P I W N P M | 113                       | V K G H R D V Q S T L S P G |
| Bt PGRP-S   | V V S H T   | A G S V . C N T P A S C Q R Q A       | N V Q Y H V R . . E R G W C D V G Y         | N F | 91                      | L G A H S S P T W N P I | 119                       | V K G H R D V Q P T L S P G |
| Cd PGRP-S   | V V S H T   | A G S H . C N T P A S C A Q A Q       | N V Q S Y H V R . . N L G W C D V G Y       | N F | 95                      | K G A H A G P T W N P I | 123                       | V K G H R D V Q P T L S P G |
| Dm PGRP-SA  | V I H H T   | V T G E . C S G L L K C A E I L       | Q N M Q A Y H V R . . E L D F N D I S Y     | N F | 104                     | R G A H T Y G . Y N A I | 131                       | L I A G S Q V I S T Q S P G |
| Dm PGRP-SD  | V I A H T   | A G G A . C A D D V T C S Q H M       | Q L N Q F N M S . . K Q K F S D I G Y       | H Y | 87                      | R G A F A G . I N D G   | 114                       | L L G H R Q V S A T K S P G |
| Dm PGRP-LAa | G S T S S   | S G L S L P Q N I F T N P A I Q       | P S S V I N L N H . . S T D V V I G P M T Q | 77  | A M Q T A A G . N M S N | 104                     | L Y V E L N R K P E L P S |                             |
| Dm PGRP-LAb | L I T H I G | V Q S L P C D N I Y K C S I K M R     | T I Q D S A I A . . E K G L P D I Q S       | N F | 182                     | A N T Y A N Q T L A I T | 210                       | L V A Q N Q T K V T R S P G |
| Dm PGRP-LC  | I A L P T   | N S E N . C S T Q A I C V L R V R     | L L Q T Y D I E . . S S Q K C D I A Y       | N F | 420                     | M G A H M N . I N Y D   | 447                       | F T A S S K L M P S V T D F |
| Dm PGRP-LCx | V I S H T   | A A F G . C E S R E V C S A R V       | N V V Q S F R M D . . S W G W D H I G Y     | N F | 401                     | V G A H T K G . Y N R G | 428                       | V I G H R Q L S T L S P G   |
| Dm PGRP-LCy | I I S E T   | P P E I . C K T Q D S C S Y W         | T R V T Q S R H M D . . T F N W S Q V G Y   | N F | 273                     | M G D H T R D . N N N N | 300                       | L L G H R Q I T G T I M P G |
| Dm PGRP-LD  | I F T H T   | G S N E . C H D . . D C P D V L R     | H K L E R S H V G . . E L P . . . . . Y N F | 185 | R S Q Y P R D . L N G I | 212                     | L G S Y T D A L Q R L R H |                             |
| Dm PGRP-LE  | V I L H T   | A T E S S E K R A I N V R L R D M     | C . F H I E . . S R G W N D I A Y           | N F | 242                     | V G A H T L G . Y N R I | 269                       | L I C H C Q C N S T S P G   |
| Bm PGRP-S   | I V Q H T   | V T F F . C R T D A G C E E L V R     | N I Q T H M M E . . A L Q Y W D I G S       | F   | 91                      | V G A H T Y G . Y N S R | 118                       | A V A H R Q L I A S E S P G |
| Bm LP2      | V I Q H T   | V S N D . C F T D E E C L L S V N     | S L R Q H M R . . L A G F K D L G Y         | S F | 91                      | I G A H T L H . Y N N I | 118                       | V V G H Q Q L I N T I S P G |
| Tn PGRP-S   | I I Q H T   | V T S T . C N T D A A C A Q I V R     | N I Q S Y R M D . . N L N Y W D I G S       | S F | 84                      | V G A H T Y G . Y N R K | 111                       | I V G H R Q L I S T E S P G |
| Ms PGRP-S   | I I Q H T   | D T F G . C D T D D A C A A R V R     | S I Q D Y H L D . . T L N Y W D I G S       | S F | 87                      | V G S H Y A . Y N R K   | 114                       | V V G H R Q L L D T S P G   |
| Ce PGRP-S   | I I M H T   | V S T Q . C T T D E A C E I R M Q     | S L Q N Y H M E . . D L G W N D I G S       | S F | 88                      | S G S H T Y G . Y N D K | 115                       | V V G Q R Q L M A T E G P G |
| Ag PGRP-S1  | I V H H T   | T G E R . C A T V A T C K E M V A N I | Q T Y H Q T . . D N R W S D I G Y           | N F | 86                      | M G A H L R G . Y N D K | 112                       | L Y G A R Q L Q S T N S P G |
| Ag PGRP-LC  | I I A H T   | A T E G . C T T Q T K C M Y Q V K L I | Q E F R S S P D S R N F S D I A Y           | Q F | 343                     | Q G A H T O G . F N V D | 370                       | L Y G H R Q L A P P E S P G |
| Ag PGRP-LA1 | I V T H I   | G L R S K N C T G M H E C A N R M R   | M L Q D A F I G . . E R N L P D I P S       | F   | 163                     | A N S Y H N R . T I S V | 190                       | L V A R Q V R L . . . . .   |

|              |                                                                                         |                                                                       |                         |                         |                             |                             |     |
|--------------|-----------------------------------------------------------------------------------------|-----------------------------------------------------------------------|-------------------------|-------------------------|-----------------------------|-----------------------------|-----|
| Hs PGRP-L    | Y V H H T Y V P A                                                                       | P P C T D F T R C A A N M R S M Q R Y H Q D . . T O G W D G I G Y S F | 449                     | V G A H T L G . H N S R | 476                         | L L G H R Q L V R T D C P G | 532 |
| Mm PGRP-L    | Y V H H T Y V P A                                                                       | P P C T T F Q S C A A N M R S M Q R F H Q D . . V R K W D D I G Y S F | 429                     | V G A H T R G . Y N S R | 456                         | L L G H R Q L V T I C P G   | 511 |
| Ss PGRP-L    | Y I H H T Y V P A                                                                       | R P C T D F A L C A A N M R S M Q R F H L D . . T O G W D D I G Y S F | 125                     | V G A H T R D . H N S R | 152                         | L L G H R Q L V R T D C P G | 208 |
| Bm LP1       | I I H H T . A I F                                                                       | T V C N T T T Q C M R D M R S M Q Y H M D . . S L G W D G I G Y H F   | 97                      | I G I H A G P . A N K L | 124                         | L I G H N Q A M T E C P G   | 179 |
| Ag PGRP-S2   | V M H H T . A G A S . C T T D A A C A Q                                                 | Q M R N I Q S F R M D . . G N G W A D I G Y N F                       | 89                      | Q G A H A P G . Y N D R | 116                         | L I G H R Q A V A T A C P G | 171 |
| Ag PGRP-S3   | V M H H T . A G F A . C T T D A A C A Q                                                 | Q M R N I Q S F R M D . . G N G W A D I G Y N F                       | 89                      | Q G A H A P G . Y N D R | 116                         | L I G H R Q A V A T A C P G | 171 |
| Ag PGRP-LB   | I I H H S Y R P A A . C Y N G L Q C I A A M Q S M Q K M H Q D . . E R Q W N D I G Y S F | 165                                                                   | I G A H A P R . Y N N R | 192                     | L L G H R Q V R T E C P G   | 247                         |     |
| Dm PGRP-SB1  | I I H H S D N P A G . C S T S E Q C K R M I K N I Q S D H K G . . R R N F S D I G Y N F | 92                                                                    | Q G S H S N . Y N R K   | 119                     | L F G H R Q T K A T S C P G | 174                         |     |
| Dm PGRP-SB2  | I I H H T . V T A P . C F N P H Q C Q L V L R Q I R A D M R . . . R R K F R D I G Y N F | 83                                                                    | R G E H A P R . Y N S Q | 110                     | V V G H C Q T K A T A C P G | 165                         |     |
| Dm PGRP-SC2  | V I H H T . A G N Y . C S T K A C I T Q L Q N I A Y H M D . . S L G W A D I G Y N F     | 87                                                                    | M G A H A . T N W N S K | 114                     | V Y G H R Q V G S T E C P G | 169                         |     |
| Dm PGRP-SC1a | I I H H T . A G S Y . C E T R A Q C N A V L Q S V Q N Y H M D . . S L G W P D I G Y N F | 88                                                                    | M G A H A . A E W N P Y | 115                     | L Y G H R Q V S A T E C P G | 170                         |     |
| Dm PGRP-SC1b | I I H H T . A G S Y . C E T R A Q C N A V L Q S V Q N Y H M D . . S L G W P D I G Y N F | 88                                                                    | M G A H A . A E W N P Y | 115                     | L Y G H R Q V S A T E C P G | 170                         |     |
| Dm PGRP-LB   | I I H H S Y M P A V . C Y S T P D C M K S M R D M Q D F R Q L . . E R G W N D I G Y S F | 80                                                                    | I G A H A P K . Y N D K | 107                     | L L G H R Q V R D T E C P G | 162                         |     |

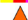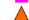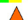

Supplement: pnas_101_49_17168__4.pdf [file pnas_101_49_17168__4.pdf]
