# Supplementary material
Source: PubMed Central journal article supplement (PMC535381)

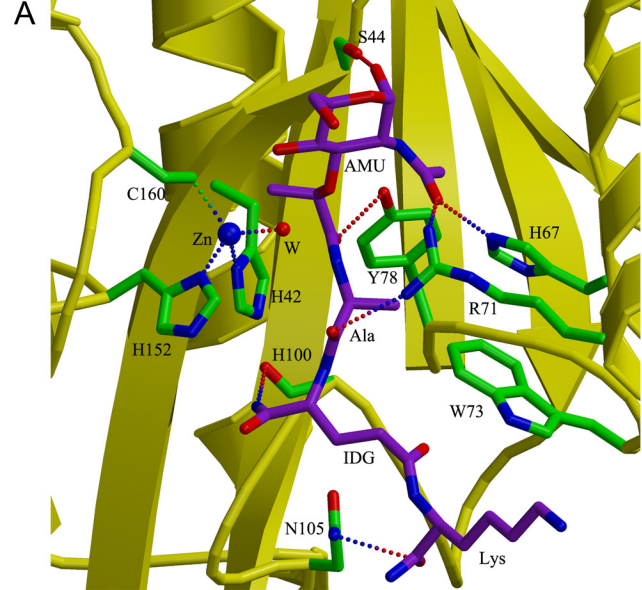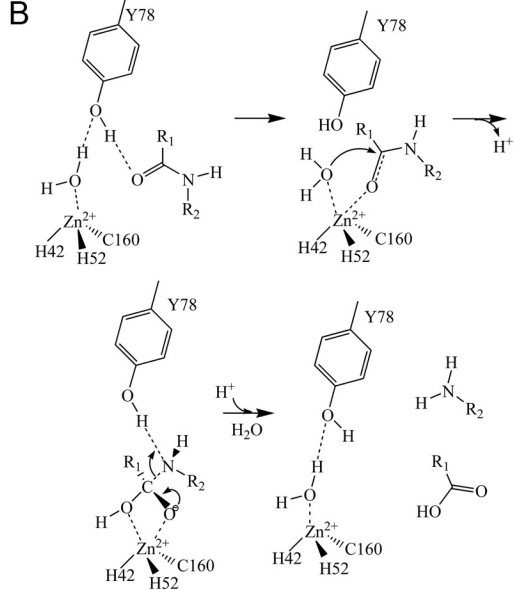

Supplement: pnas_101_49_17168__5.pdf [file pnas_101_49_17168__5.pdf]
